# Supplementary material for: The Endo-α(1,3)-Fucoidanase Mef2 Releases Uniquely Branched Oligosaccharides from Saccharina latissima Fucoidans
Source: MDPI journal article supplement (doi:10.3390/md20050305), 2022-04-29
Supplement: s1 [file s1]

## Supplementary Information

**Table S1.** Percent identity matrix of the catalytic D1 domain of Mef2 and the characterized members of the GH107 family

|                     | MfFcna | FFA1 | Fhf1 | FFA2 | FWf1 | FWf3 | P5AFcna   | P19DFcna  | <b>Mef2</b> | Fda1      | Fda2      | SVI_0379 |
|---------------------|--------|------|------|------|------|------|-----------|-----------|-------------|-----------|-----------|----------|
| MfFcna/34-418*      | 100    | 83   | 72   | 63   | 53   | 38   | 16        | 17        | 14          | 23        | 23        | 26       |
| FFA1/31-415*        | 83     | 100  | 72   | 62   | 54   | 37   | 16        | 17        | 14          | 23        | 23        | 25       |
| Fhf1/29-447*        | 72     | 72   | 100  | 68   | 54   | 38   | 17        | 17        | 16          | 25        | 24        | 25       |
| FFA2/41-433*        | 63     | 62   | 68   | 100  | 52   | 39   | 17        | 17        | 16          | 23        | 22        | 25       |
| FWf1/15-439*        | 53     | 54   | 54   | 52   | 100  | 40   | 17        | 16        | 13          | 24        | 25        | 23       |
| FWf3/213-589*       | 38     | 37   | 38   | 39   | 40   | 100  | 15        | 18        | 15          | 23        | 24        | 22       |
| P5AFcna/36-393*     | 16     | 16   | 17   | 17   | 17   | 17   | 100       | 72        | 39          | 22        | 23        | 22       |
| P19DFcna/31-393*    | 17     | 17   | 17   | 17   | 16   | 18   | 72        | 100       | 40          | 23        | 24        | 22       |
| <b>Mef2/22-383*</b> | 14     | 14   | 16   | 16   | 13   | 15   | <b>39</b> | <b>40</b> | 100         | <b>21</b> | <b>23</b> | 20       |
| Fda1/23-372*        | 23     | 23   | 25   | 23   | 24   | 23   | 22        | 23        | 21          | 100       | 72        | 44       |
| Fda2/84-439*        | 23     | 23   | 24   | 22   | 25   | 24   | 23        | 24        | 23          | 72        | 100       | 40       |
| SVI_0379/26-367*    | 26     | 25   | 25   | 25   | 23   | 22   | 22        | 22        | 20          | 44        | 40        | 100      |

\* Indicate the amino acid sequence numbers used for the analysis

**Table S2.** Thermostability by DLS of Mef2 with Ca<sup>2+</sup> and without Ca<sup>2+</sup>

| <b>Mef2 Stability</b>   | <b>T<sub>m</sub> (°C)</b> |
|-------------------------|---------------------------|
| Mef2 - Ca <sup>2+</sup> | 37.9 ± 0.05               |
| Mef2 + Ca <sup>2+</sup> | 44.4 ± 0.03               |

**Table S3.** Monosaccharide composition of fucoidan fraction 4 (FeF4) purified from enzymatic extracts of *F. evanescence*

| FeF4                                 |                 |            |
|--------------------------------------|-----------------|------------|
| Neutral<br>monosaccharides<br>(mol%) | Fucose          | 88.1 ± 0.0 |
|                                      | Rhamnose        | 0.8 ± 0.0  |
|                                      | Galactose       | 7.3 ± 0.3  |
|                                      | Glucose         | 0.7 ± 0.1  |
|                                      | Xylose          | 1.1 ± 0.1  |
|                                      | Mannose         | 0.2 ± 0.0  |
| Uronic acids (%)                     | Guluronic acid  | 0.1 ± 0.1  |
|                                      | Glucuronic acid | 0.5 ± 0.2  |
|                                      | Mannuronic acid | 1.1 ± 0.5  |
| Sulfate (%)                          |                 | 38.1 ± 1.2 |

The data are given in %mol (relative level) of total carbohydrates analyzed in the fucoidan fractions

**Table S4.** Monosaccharide composition of fucoidan fractions purified from enzymatic extracts of *S. latissima* from Ocean Rainforest

|                                      |                 | SIF1                     | SIF2                    | SIF3                     | SIF4                    |
|--------------------------------------|-----------------|--------------------------|-------------------------|--------------------------|-------------------------|
| Neutral<br>monosaccharides<br>(mol%) | Fucose          | 31.7 <sup>c</sup> ± 2.2  | 69.0 <sup>a</sup> ± 0.8 | 58.6 <sup>b</sup> ± 0.3  | 63.1 <sup>b</sup> ± 0.5 |
|                                      | Rhamnose        | 0.4 <sup>c</sup> ± 0.1   | 1.0 <sup>b</sup> ± 0.0  | 0.8 <sup>b,c</sup> ± 0.0 | 2.0 <sup>a</sup> ± 0.1  |
|                                      | Galactose       | 0.5 <sup>d</sup> ± 0.1   | 17.4 <sup>c</sup> ± 0.2 | 34.8 <sup>a</sup> ± 0.4  | 22.1 <sup>b</sup> ± 0.0 |
|                                      | Glucose         | 0.3 <sup>d</sup> ± 0.0   | 0.4 <sup>c</sup> ± 0.0  | 0.5 <sup>b</sup> ± 0.0   | 0.9 <sup>a</sup> ± 0.0  |
|                                      | Xylose          | 2.4 <sup>c</sup> ± 0.3   | 5.1 <sup>b</sup> ± 0.2  | 2.7 <sup>c</sup> ± 0.1   | 7.3 <sup>a</sup> ± 0.3  |
|                                      | Mannose         | 0.6 <sup>d</sup> ± 0.1   | 2.1 <sup>a</sup> ± 0.1  | 1.0 <sup>c</sup> ± 0.0   | 1.8 <sup>b</sup> ± 0.0  |
| Uronic acids (%)                     | Guluronic acid  | 2.5 <sup>a</sup> ± 0.1   | 0.2 <sup>b</sup> ± 0.1  | 0.1 <sup>b</sup> ± 0.0   | 0.2 <sup>b</sup> ± 0.0  |
|                                      | Glucuronic acid | 1.3 <sup>b,c</sup> ± 0.3 | 3.7 <sup>a</sup> ± 0.4  | 1.1 <sup>c</sup> ± 0.0   | 2.3 <sup>b</sup> ± 0.0  |
|                                      | Mannuronic acid | 60.2 <sup>a</sup> ± 3.2  | 1.2 <sup>b</sup> ± 0.1  | 0.4 <sup>b</sup> ± 0.3   | 0.5 <sup>b</sup> ± 0.1  |
| Sulfate (%)                          |                 | 11.3 <sup>c</sup> ± 1.0  | 28.4 <sup>b</sup> ± 2.1 | 35.6 <sup>a</sup> ± 0.4  | 32.1 <sup>a</sup> ± 3.1 |

The data are given in %mol (relative level) of total carbohydrates analyzed in the fucoidan fractions

Different superscript letters a,b,c indicate statistically different values ( $p < 0.05$ ) between the values in the fucoidan fractions

**Table S5.** Monosaccharide composition of *S. latissima* MMP after Mef2 hydrolysis

| MMP                            |                 |            |
|--------------------------------|-----------------|------------|
| Neutral monosaccharides (mol%) | Fucose          | 48.1 ± 0.0 |
|                                | Rhamnose        | 1.0 ± 0.6  |
|                                | Galactose       | 44.0 ± 3.7 |
|                                | Glucose         | 0.3 ± 0.2  |
|                                | Xylose          | 2.3 ± 0.3  |
|                                | Mannose         | 1.7 ± 1.9  |
| Uronic acids (%)               | Guluronic acid  | 1.6 ± 1.2  |
|                                | Glucuronic acid | 0.7 ± 0.1  |
|                                | Mannuronic acid | 0.3 ± 0.5  |
| Sulfate (%)                    |                 | 34.2 ± 1.8 |

The data are given in %mol (relative level) of total carbohydrates analyzed in the fucoidan fractions

**Table S6.** Monosaccharide composition and sulfate content of fractionated *S. latissima* MMP

| Fractions | Monosaccharide composition                            | Sulfate, % |
|-----------|-------------------------------------------------------|------------|
|           | Fuc:Gal:Rha:Glu:Xyl:Man:GuluA:GluA:ManA (mol:mol)     |            |
| MF1       | 1 : 0.29 : 0.07: 0.02 : 0.14 : 0.02: 0.00: 0.02: 0.02 | 52.1 ± 0.8 |
| MF2       | 1 : 0.42 : 0.06: 0.02 : 0.12 : 0.02: 0.00: 0.01: 0.02 | 48.2 ± 1.9 |
| MF3       | 1 : 0.56 : 0.04: 0.02 : 0.07 : 0.01: 0.00: 0.01: 0.01 | 52.1 ± 0.8 |
| MF4       | 1 : 0.52 : 0.03: 0.02 : 0.06 : 0.01: 0.00: 0.00: 0.01 | 54.8 ± 2.9 |
| MF5       | 1 : 0.73 : 0.03: 0.02 : 0.07 : 0.01: 0.00: 0.00: 0.01 | 27.8 ± 1.6 |
| MF6       | 1 : 0.65 : 0.03: 0.02 : 0.06 : 0.01: 0.00: 0.00: 0.02 | 28.7 ± 3.3 |

**Table S7.** Monosaccharide composition of fucoidan fraction 3 from different brown seaweed species

|                                      |                 | <i>S. polycystum</i>    | <i>S. oligocystum</i>     | <i>S. serratum</i>        | <i>T. ornata</i>         | <i>H. cuneiformis</i>     | <i>S. mcclurei</i>        |
|--------------------------------------|-----------------|-------------------------|---------------------------|---------------------------|--------------------------|---------------------------|---------------------------|
| Neutral<br>monosaccharides<br>(%mol) | Fucose          | 46.7 <sup>d</sup> ± 4.5 | 66.4 <sup>c</sup> ± 3.4   | 81.5 <sup>a,b</sup> ± 0.8 | 85.6 <sup>a</sup> ± 0.3  | 72.7 <sup>b,c</sup> ± 0.0 | 78.5 <sup>a,b</sup> ± 1.7 |
|                                      | Rhamnose        | 0.5 <sup>a</sup> ± 0.4  | 0.8 <sup>a</sup> ± 0.6    | 0.2 <sup>a</sup> ± 0.0    | 0.0 ± 0.0                | 0.3 <sup>a</sup> ± 0.4    | 0.3 <sup>a</sup> ± 0.0    |
|                                      | Galactose       | 26.1 <sup>a</sup> ± 4.9 | 24.3 <sup>a,b</sup> ± 2.3 | 9.7 <sup>c</sup> ± 0.4    | 9.9 <sup>c</sup> ± 0.5   | 20.2 <sup>a,b</sup> ± 0.4 | 15.4 <sup>b,c</sup> ± 0.5 |
|                                      | Glucose         | 1.3 <sup>a</sup> ± 0.0  | 0.7 <sup>b</sup> ± 0.3    | 0.2 <sup>b,c</sup> ± 0.0  | 0.2 <sup>b,c</sup> ± 0.0 | 0.2 <sup>c</sup> ± 0.1    | 0.1 <sup>c</sup> ± 0.1    |
|                                      | Xylose          | 18.3 <sup>a</sup> ± 2.6 | 3.8 <sup>b</sup> ± 0.1    | 3.7 <sup>b</sup> ± 0.2    | 0.8 <sup>b</sup> ± 0.0   | 2.6 <sup>b</sup> ± 0.1    | 2.8 <sup>b</sup> ± 0.3    |
|                                      | Mannose         | 0.0 ± 0.0               | 1.1 <sup>a</sup> ± 0.0    | 0.6 <sup>b</sup> ± 0.0    | 0.20 <sup>c</sup> ± 0.1  | 0.0 ± 0.0                 | 0.0 ± 0.0                 |
| Uronic acids<br>(%mol)               | Guluronic acid  | 0.7 <sup>a</sup> ± 0.2  | 0.1 <sup>a</sup> ± 0.0    | 0.1 <sup>a</sup> ± 0.0    | 0.2 <sup>a</sup> ± 0.0   | 0.4 <sup>a</sup> ± 0.2    | 0.1 <sup>a</sup> ± 0.1    |
|                                      | Glucuronic acid | 0.6 <sup>a</sup> ± 0.1  | 1.0 <sup>a</sup> ± 0.1    | 0.5 <sup>a</sup> ± 0.0    | 0.5 <sup>a</sup> ± 0.2   | 1.0 <sup>a</sup> ± 0.4    | 0.5 <sup>a</sup> ± 0.2    |
|                                      | Mannuronic acid | 5.2 <sup>a</sup> ± 0.5  | 1.8 <sup>a</sup> ± 0.0    | 3.4 <sup>a</sup> ± 0.1    | 2.5 <sup>a</sup> ± 0.0   | 2.4 <sup>a</sup> ± 0.3    | 2.0 <sup>a</sup> ± 2.1    |
| Sulfate (%)                          |                 | 24.6 <sup>c</sup> ± 0.8 | 27.7 <sup>c</sup> ± 1.8   | 38.1 <sup>a</sup> ± 4.0   |                          | 29.4 <sup>b,c</sup> ± 2.3 | 31.4 <sup>b</sup> ± 2.6   |

The data are given in %mol (relative level) of total carbohydrates analyzed in the fucoidan fractions

Different superscript letters a,b,c indicate statistically different values ( $p < 0.05$ ) between the values in the fucoidan samples

|                  |                                                                |     |
|------------------|----------------------------------------------------------------|-----|
| FWf3/213-589     | ALGERAVNLRGTWN-----SEI-----LVDLLDDRKNLKTNLRLGVSFTN             | 41  |
| Fp273/234-617    | AAGERAVGLRGTV-----GGV-----GD---LESIKHFKTLTTMGASFSS             | 38  |
| FFA2/41-433      | DLGLRADWMRGSLGLLWLPENNYNGNIEGV-----SIEDFLTQIQHLKTVDFVQVGLAS    | 54  |
| Fhf2/31-439      | DLGLRADWMRGSLGLLWLPENNYNGNIEGV-----SIEAFLTQIQHLKTVDFIQVGLAS    | 54  |
| Fhf1/29-447      | NQGLRANWMRGSWAALWLPENNYNGHIEGV-----SIEPFIEQIKELETIDYIQIGLTN    | 54  |
| FWf4/37-421      | EQGLRANWMRGALGLLWLPERNYNGNIEGV-----EIDEFISQVKDLRTIDYVQVPLTS    | 54  |
| MfFcnA/34-418    | NQGLRAEWMRGALGMLWLPERTFNNGNIEGI-----RIDDFLTQIKDIRTVDYVQVPLTS   | 54  |
| FFA1/31-415      | DQGLRAEWMRGSGYGLWLPERNFNNGNIEGI-----RIDEFITQIKDIRTVDYVQVPLTS   | 54  |
| FWf2/243-679     | ALGERADWLRGTVGVTWTPSNYQNGNVEDV-----SIDDFLNQISEVKTISYIQVKLGS    | 54  |
| Fp279/40-449     | KITTRADWLRGSWGLNWKPTDLWNGAGEAL-----TIDLFLEQISHLKTIDYVQVHLNE    | 54  |
| FWf1/15-439      | NQGLRAHWLRGTWGINWKPVNLYNGGHEGL-----SIEPFLNQISHIKTIDYIQVHLGE    | 54  |
| Fp277/26-435     | -VESRGDWLRNSWGINWKPVDVYNGKSESL-----EIDIFLDQISHLKTIDYIQSHLGE    | 53  |
| SVI_0379/26-367  | -TESKAVWMEGKVGVGFRINADR---KD-NIENY-DVDTLVNQIKTIDIGISYVIFNLSD   | 53  |
| Fda1/23-372      | --ETKADWMQGNWGISYRIPGGDINYSGS-HVAEY-NVRAAVEQISAIPGLKWLQVNLNLTN | 56  |
| Fda2/84-439      | PEDIRASWMQGNWGISFRISGGDISQNES-HVNEY-QVAPAVEQIAAIPGLKWLQVNLNLTN | 58  |
| Mef2/22-383      | ---DDSWLEGSWGITFPVFGGARLDAEV--AGGLDPVSGAQEIVDELSEVGHVITNLSY    | 54  |
| P5A_FcnA/36-393  | GIEYNASWMAGTWGITQRVDGGYKLDNSA---DSSNWQAGAEIIVTNIPAAEYVITSFTH   | 57  |
| P19D_FcnA/31-393 | DSEYTANWMAGAWGITQRVDGGYKL-DASVETGKYDWWAGAEIIVENIPSAGYVITSFTH   | 59  |
|                  | : . : :                                                        |     |
| FWf3/213-589     | GAVLSAEHKVPKHLFDRLSG-----GDVVAPSWGDL--NSDTPDNNDNMLADI          | 86  |
| Fp273/234-617    | GASASQHNAPHKFLLETIALKGV---NGNGPAIDYVVPASWGDL--SLDEPESDFFLDNI   | 93  |
| FFA2/41-433      | PYIYSPVHTAPHPLLERLWEGDL---GPDGKPI-NLVVPRASA-----PDPFLGWL       | 101 |
| Fhf2/31-439      | PYIYSPVHTAPHPLLEKLWEGDL---GPDGKPI-NLVVPRASA-----PDPFLSWL       | 101 |
| Fhf1/29-447      | PNIYSPVHTAPHPIIESLWQGDV---DPDGNPL-NLVVPRASA-----PDPFLSWL       | 101 |
| FWf4/37-421      | PNIFSPVHVAPHSIIESLWEGDT---DSNGDPI-NLVVPRESV-----DDPLLRLWL      | 101 |
| MfFcnA/34-418    | PNIFSPTHVAPHPIIESLWQGDV---DANGDPI-NLVAPRESV-----DDPLLRLWL      | 101 |
| FFA1/31-415      | PNIFSPIHVPHSLIESFWEGDT---DANGDPI-NLVAPRESV-----DDPLLRLWL       | 101 |
| FWf2/243-679     | SYIYSPVFAAPHQVLESFWYNDGVDRDNGEPVQNLVVPWRWNG--TI--AENDPFLDWI    | 110 |
| Fp279/40-449     | SYINSPSHLGTHELLESFWQGDV---SPLGTPM-NLVVPRAST-----GVDPFLEMI      | 102 |
| FWf1/15-439      | SSIKSSVHMGPMSLLESFWEGDT---DANGDPI-NLVVPRASY-----GEDPFLEIV      | 102 |
| Fp277/26-435     | SSIKSSVHIAPHELLESFWQGDV---DATGNPV-NLVVPRASA-----NVDPLFKIL      | 101 |
| SVI_0379/26-367  | AAH-GDAYLAPHSIL-----TTLNPDSTPNAD-----RDLFGELA                  | 87  |
| Fda1/23-372      | GAS-GDRFIVPVTEV-----EAINPLSAPNSINDLYDPTLPGRDLFEQLA             | 100 |
| Fda2/84-439      | GAF-GDRFIVPVPEV-----EAINPNSAPNSADLFDPALPGDDLEFQIA              | 102 |
| Mef2/22-383      | FAH-SHYFTLSQNNYINIR-----NEIHPDVVP-----SAANDDIIFDVL             | 93  |
| P5A_FcnA/36-393  | PAH-GHLFTLRTNNNVDV-----SAIHPDMVP-----TLENEKIIFDVI              | 95  |
| P19D_FcnA/31-393 | PAH-GFLYTLRDNENVDV-----AAIHPDMVP-----SLENEKIIFDVI              | 97  |
|                  | . . . *                                                        |     |
| FWf3/213-589     | LKIKAAGFNVKAYTNSENFVGT-----                                    | 108 |
| Fp273/234-617    | LAIKAAAGFKIKAYLNSENFLGS-----                                   | 115 |
| FFA2/41-433      | KAIKAAAGLKTEVYVNSANLLWEAF-----G-----                           | 127 |
| Fhf2/31-439      | KAIKAAAGLKTEVYVNSANLLQWEAF-----N-----                          | 127 |
| Fhf1/29-447      | KAIKAAAGLKTEIYVNSYNLLARVP-----D-----                           | 126 |
| FWf4/37-421      | KALKAEGLRVEIYVNSYNLLARNP-----E-----                            | 126 |
| MfFcnA/34-418    | KALRAAGLRTEIYVNSYNLLARIP-----E-----                            | 126 |
| FFA1/31-415      | KALRAAGLKAEIYVNSYNLLARIP-----E-----                            | 126 |
| FWf2/243-679     | TKIKAAAGLKQVYVNSSNMLQRYSDSYEDGRI-----                          | 142 |
| Fp279/40-449     | KKSQKAGLKQVYVNSSNLLTRG-A----TF-----                            | 128 |
| FWf1/15-439      | KAIRAAGLKVMYVNSSNMLSREGP-----GG-----                           | 129 |
| Fp277/26-435     | KKVKAAGMKNQVYVNSSNMLQNES-----T-----                            | 126 |
| SVI_0379/26-367  | KAFHAAGIKVIAAATQGPAML-----KHGAAYAFDGVQD-----                   | 122 |
| Fda1/23-372      | LAFKAKGIRVVAYIATQGPAML-----KHGAENSMDDEDSIT-----DCKSSKPLVTDL    | 149 |
| Fda2/84-439      | LGLQAKGIKVAYIATQGPAML-----KHGAERSMDFDSDIVDES DGSACKSSRPVSDP    | 157 |
| Mef2/22-383      | DIFKNSDKKIILYISTQYFAR-----ADEDN-----                           | 119 |
| P5A_FcnA/36-393  | NIYRAAGKKVILYLSAGPSMA-----EERGD-----                           | 122 |
| P19D_FcnA/31-393 | NVYKSAGKKVLLYLNATGPTHA-----ADRNS-----                          | 124 |
|                  | : . . * :                                                      |     |
| FWf3/213-589     | -NADYLQPFVDSWKEYCDTDPVQAFINSQPYHTGIWNRTEQYEDATATYPNRKYMFCY     | 167 |
| Fp273/234-617    | -NQDHLQEFVDRWKEYCDNDVAVQAFINSQPFHTSVWDTETQTYVDATETYPNRKYMFCY   | 174 |
| FFA2/41-433      | TPISEFPDFSERWKAYCDTPTMQAFIESQPYHKDGVN-----DDRRPYMFCY           | 175 |
| Fhf2/31-439      | GAPSEFPDFSNRWKAYCDTPTVQAFINSEAYHKDGVN-----DDRRPYMFCY           | 175 |
| Fhf1/29-447      | GIPAGYDLSERWEEYCNTNATAQAFIKNNPYISED-D-----PERRKYMFCY           | 173 |
| FWf4/37-421      | DTQTEYPDVSDRWMEWCNTNAAEQAFINTQTYHN---G-----SGRRYMYFCY          | 171 |

|                  |                                                               |     |
|------------------|---------------------------------------------------------------|-----|
| MfFcnA/34-418    | DTQADYDPDVSARWMEWCDTNTNEAQAFINSQTYHE---G-----NGRRKYMFCY       | 171 |
| FFA1/31-415      | DTQEDYDPDVSERWMEWCDTNPNEAQAFIASQDFHE---G-----DGRRKYMFCY       | 171 |
| Fwf2/243-679     | PSPNELPDVTNRWKAYCDANY--TTFINSQPYHTGIYNSATGNYVNSEAEFFPERKYVFCF | 200 |
| Fp279/40-449     | SNPASFPDITDRWKEWVDTNPEAQAFIHSQPYHTGIWDAESETYVDASETYPERKYMFCY  | 188 |
| Fwf1/15-439      | SNPDYIPNITERWKEWCDTNAEAQAFIASQPYHTGVWDETSKTYINSETEFPERKYMFCY  | 189 |
| Fp277/26-435     | PNPDIIPNITERWKAQVWDSAEAAQAFIASQPYHTGTWDADTQSYVDATATYPERKYMFCY | 186 |
| SVI_0379/26-367  | ANGHWSSKSMTNWAKWVTNKYGSASDDN-----YKKAY                        | 155 |
| Fda1/23-372      | DTQVYCSANMNRWRDYVLEQYPSTSLYR-----SFELA                        | 182 |
| Fda2/84-439      | DTQVYCSANMNRWRDYVLEQYPSTSLHH-----SFQLG                        | 190 |
| Mef2/22-383      | -----IDIKTNWDQFVTQYP-----SQNDA                                | 139 |
| P5A_FcnA/36-393  | -----TDIQAADWEYINWEDG-----DEAAA                               | 144 |
| P19D_FcnA/31-393 | -----PEIQDAWDDYVNTNWNG-----DHGAA                              | 146 |
|                  | * :                                                           |     |
| Fwf3/213-589     | AEYFLKDYALRYGEHFDSWIFDDGATM--EQNGDNATSGVVEEQRIYQAYANAVHAGNPD  | 225 |
| Fp273/234-617    | AEFVLKDYALRYAKYIDSWIFDDGGTM--VENGDNATSGLVVEEQRIYQAYANAVHAGNPE | 232 |
| FFA2/41-433      | AEFVLKEYAMRYGDLIDAWCFDAAHVNM--GAAGDDYSTGIDTQRVFQAFADACHAGNPD  | 234 |
| Fhf2/31-439      | AEFILKDYAMRYGDLIDAWCFDAAHVNM--ASAGDDYSTGNIDTQRVYQAFADACHAGNPN | 234 |
| Fhf1/29-447      | AEFILKEYSERYGDLIDAWCFDSADNIM--GACGDEPQSDDVNHQRIYQAFADACHAGNPN | 232 |
| Fwf4/37-421      | AEFILKEYAIRYGDLIDAWCFDSADNIMEDECGDNPDSENVEDQRIYQAFANAVHAGNPN  | 231 |
| MfFcnA/34-418    | AEFILKEYAQRYGDLIDAWCFDSADNIMEDECGDDPASEDVNDQRIYQAFADACHAGNPN  | 231 |
| FFA1/31-415      | AEFILKEYANRYGDLIDAWCFDSADNIMEGECGDDPASDDIDDQRIYQAFAEACHSGNPK  | 231 |
| Fwf2/243-679     | AEYILKEYATRYGDLIDAWVFDSGEFM--VSNGDDSESGILEEQRLYEAFANAVHAGNEN  | 258 |
| Fp279/40-449     | AEFVLKEYAVRYGNLIDGWLFDSGDFM--KKNGDNATNGVKAQQIYKAFADACHAGNPM   | 246 |
| Fwf1/15-439      | AEFVLKEYAIRYGDLIDAWCFDSGSWM--GMNGDSQTNGIYEDQMIFNAFKAACHAGNPD  | 247 |
| Fp277/26-435     | AEFVLKVYSERYGDLIDGWLFDSGSFM--YSNGDSATNGVKEDQSLYGAFAKAAQAGNPN  | 244 |
| SVI_0379/26-367  | AEVIAEYARQRYGSLIDGWVFDHSSCA-----NIPLLHKITKANPA                | 197 |
| Fda1/23-372      | MVNIVETLSLRYGSTIDGWVFDHSGFG-----DSELLHAAALAGNND               | 224 |
| Fda2/84-439      | LVNIVETLSLRYGTLIDGWVFDHSGFG-----DYNLLPDAARAGNSN               | 232 |
| Mef2/22-383      | YVELLRGFVEYLKDYADGYWLDTVTA-----NVEDIVDMIREVDPT                | 180 |
| P5A_FcnA/36-393  | WRNLARGYVERFDGLVDGYWLDNSRNLN-----G--EVSDVFAMLRSDVDE           | 188 |
| P19D_FcnA/31-393 | WRNLVEGYAKRFKGLVDGYWLDNSKNMA-----GGQKEIPEFVAMLRDIDPS          | 193 |
|                  | . * : ** :                                                    |     |
| Fwf3/213-589     | IAIAFNNGRSTVN---Y-----KD--YPFAHAVRFEDFTFGHA                   | 258 |
| Fp273/234-617    | IPIAFNNGRSTTA---Y-----AS--TPFAHAVRFEDFTFGHA                   | 265 |
| FFA2/41-433      | AAITFNNIGDRDS---D-----PF--VPYVTPSLFEDYKFGHP                   | 268 |
| Fhf2/31-439      | AAITFNNIGDRDS---D-----PF--LPYRTPSLFEDYKFGHP                   | 268 |
| Fhf1/29-447      | AAISFNNVSGDREL---N-----PF----STATYFDDYTFGHP                   | 263 |
| Fwf4/37-421      | AAVAFNNVSGDRVE---N-----PF----STATLFDDYTFGHP                   | 262 |
| MfFcnA/34-418    | AAIAFNNVSGDREG---N-----PF----TSATLFDDYTFGHP                   | 262 |
| FFA1/31-415      | AAISFNNVSGDREG---N-----PF----TTATYFDDYTFGHP                   | 262 |
| Fwf2/243-679     | AAVAFNNVGNPNRHEANAANG-----TV--TPYSHATHFDDFMFGHP               | 296 |
| Fp279/40-449     | AAISFNNVSPNRVT---E-----SL--NPFSEATHYDDYFMFGHP                 | 279 |
| Fwf1/15-439      | AALSFFQNSPERDT---E-----EL--NPFSEAVHADDYFMFGHP                 | 280 |
| Fp277/26-435     | APVSFNNVSPERDT---E-----EL--NPFSEATHYDDYFMFGHP                 | 277 |
| SVI_0379/26-367  | VILAFNNKGQKVPLI-----NNNPGYEDYTSFGHP                           | 225 |
| Fda1/23-372      | AAVAFNNEGDKVPLV-----NNPETLDDYTFGHP                            | 252 |
| Fda2/84-439      | AAVSLNLEGDIFLS-----NNPEVMEDFTGGHP                             | 260 |
| Mef2/22-383      | AVVTTNKGKDYIRLDGTKAVVASNVSITGETSPKVGYNIRHTLDVASTTQDFTNHGV     | 240 |
| P5A_FcnA/36-393  | LTIAVNYDQHYFTDDNGEYLYVDSGLDDEDE---SDYKIVKHVV--TNEYMDFTNGHV    | 242 |
| P19D_FcnA/31-393 | FAIGVNYETHYFEDEDGNYGLKVASDSIDNDND---REYKIIKHVV--TNEYMDFTNGHV  | 247 |
|                  | : : * : **                                                    |     |
| Fwf3/213-589     | FGGNNNHAEKI-----N--GNQFNLNRYHITRMTETNGLVHAG-----              | 294 |
| Fp273/234-617    | FGGNNNHAEKE-----N--GNQFNNYRHVTRMTETNGYVHAG-----               | 301 |
| FFA2/41-433      | FGGAGNMVEPR-----DPLYTVNFGICEYMRDNTNGHPYTN-----                | 303 |
| Fhf2/31-439      | FGGAGNMVEPR-----DPLYTVNFGICEYMRDNNGLPYTN-----                 | 303 |
| Fhf1/29-447      | FGGAGNMVEPR-----DPLYTYNYHVIEWMSDYNGSAFLVESVNKEISTDGNKILI      | 314 |
| Fwf4/37-421      | FGGAGNMVEN-----ETLYRYNYHVIEWMDYAGDAFLD-----                   | 296 |
| MfFcnA/34-418    | FGGAGNMVVP-----EALYTYNHDLVVFMQTNNGYAFRD-----                  | 296 |
| FFA1/31-415      | FGGAGNMVEN-----ETLYGYNFGVIEWMDYNGSAFLD-----                   | 296 |
| Fwf2/243-679     | YNGGKSIGKDKADYYDTGAYPTNYGRNYAHMLWMQGTGGNVHLYR-D-----SSNPV     | 347 |
| Fp279/40-449     | YNGGTFIGNHD-----N---TNYDRNYRHQKVSETNGNIHSGSLD-----AGTDS       | 322 |
| Fwf1/15-439      | YNGGRDGGSH-----IGTPLYSRNYAHIEKMKETNGYAH-----GSDP              | 321 |
| Fp277/26-435     | YNGGRVIGNHE-----N---GLYERNYAHQKITATNGNVHSGSVA-----AGTDA       | 320 |
| SVI_0379/26-367  | TPLRRSTVS-ND-----NLP---MVESIEASSNGYV-----                     | 252 |
| Fda1/23-372      | TPIGSEVSSDDK-----NLP---MLTSIEATLDGIL-----                     | 280 |
| Fda2/84-439      | TPIARVSSDDT-----NLP---MLTAIEDAPNGIF-----                      | 288 |
| Mef2/22-383      | TSII-KAPTDSW-----GYEFTVGDMIPEPYTE-----                        | 268 |
| P5A_FcnA/36-393  | TPLGRGAPPNSW-----AYEETIPDMIEVPWET-----                        | 271 |

|                  |                                                                 |     |
|------------------|-----------------------------------------------------------------|-----|
| P19D_FcnA/31-393 | TPMQQGAPPNSW-----GYEETIPHMIEKPWDS-----                          | 276 |
| FWf3/213-589     | GNWDWDDKIVGNFHSKLSSTAWKYGPN-QAWEQADFNQWNLEAIQAGGSMTWGGSFNRA-    | 352 |
| Fp273/234-617    | GNWEWDDRIVGNFHSKLSSTAWTYGPN-QAWEEDFLQWNLEAMHAGGMSWDGSRPRT-      | 359 |
| FFA2/41-433      | DDIDWNDNVVAHFFPKQSTTSWNDGGT-PCLTDEEFVEWNNVGLINGGGITWGTPLVITN    | 362 |
| Fhf2/31-439      | DGIDWNDNVVAHFFPKQSTTSWNDGGT-PCLTDGEFVEWNNVGLINGGGITWGTPLVITN    | 362 |
| Fhf1/29-447      | ENRAWNDNVVSHFFPKQSATSWNAGNT-PCLTDEEFVEWTSTGIIDGGAITWGTPLVRTN    | 373 |
| FWf4/37-421      | DTRDWNKVVSHFFPKQSSTSWNAGST-PCLTDEQFVEWTTNGIIDGGAITWGTPLIRTN     | 355 |
| MfFcnA/34-418    | DTRTWNDNVVAHFFPKQSTTSWNAGNT-PCLTDEQFVEWTSTGIVNGGGITWGTPLVRTN    | 355 |
| FFA1/31-415      | DDRTWNDNVVSHYFPKQSATSWNAGNT-PCLTDDQFVEWTSKGIIDGGAITWGTPLIRTN    | 355 |
| FWf2/243-679     | DEWEFDNKVVGGFYPPMSTTSWQGGAT-QALEQVDFELWNQVAIDHGGTIIWGTALEIYN    | 406 |
| Fp279/40-449     | QNWDWDDKVVGHFDPMPMSRTRWNSGAD-PGLSDEDFLLWNYESAVGGGAISWGAPLYSP-   | 380 |
| FWf1/15-439      | QTWTWDDNVVAHYDPPMSTTSWNGGNT-PALTDEEFNLWNLEAVQNGGAISWGLPLVKK-    | 379 |
| Fp277/26-435     | HDWDWDDKVIHGFDPMPMSTTSWNGGNT-PALTDDEFNLWNLESAGGGGAISWGLALVGK-   | 378 |
| SVI_0379/26-367  | D-DGAGHKSLGHMFPLG-NTWNSGL--SVWPLSKAVDWITRVNNACGAWTWNVATQDTN     | 308 |
| Fda1/23-372      | TGSGDDVGSVGHMFPLQ-ESWNGGT--VVFSEAKGSDWLNRLKAGGAFTWALSQDSND      | 337 |
| Fda2/84-439      | TGTGDDVDALGHMFPLQ-ETWNGGT--VVFSEAKGTEWLNRVTRAGGALTWALSHEG--     | 343 |
| Mef2/22-383      | --YLGNP-VIKHAWFPVR-YRWHSTRELLYDTERS YRTVKSIIIDAGASVTLAN TVDYNT  | 324 |
| P5A_FcnA/36-393  | --YDGSKYALKHGWFPPIR-NSWSGSKAELMFDEQAYRFVRTVTDGGAAMTWSTTQ--DN    | 326 |
| P19D_FcnA/31-393 | --VDGNHYALMHGWFPPIR-FSWSGSGAELMFETE QAYRFVRTITD GGAAMTWSTTQ--KK | 331 |
|                  | * .                                                             |     |
| FWf3/213-589     | -----ETAI-YDWVYVLLLEGLDDYLVQYGNP-----                           | 377 |
| Fp273/234-617    | -----SDDL-YTWAYDLLKGLDDHLAKYQKP-----                            | 384 |
| FFA2/41-433      | LNNASANLTL-QPYALRQLELVDADLSANQFP-----                           | 393 |
| Fhf2/31-439      | LNNASPNLTL-QPYALRQLELVDADLSVNQYPGAPNWARQYTVLPEII                | 409 |
| Fhf1/29-447      | LNN-APDLTL-QPYALRQLALTDEYLKQNFPGAPNWARQTRLSEVI                  | 419 |
| FWf4/37-421      | LEN-SPELVL-RDYALTQLTLTDDFLKEFQYP-----                           | 385 |
| MfFcnA/34-418    | LEN-APVLTTL-QPYALNQFELTDTYLKEFQSP-----                          | 385 |
| FFA1/31-415      | LEN-SPVLTTL-RDYAVTQFELTDAYLKEFQSP-----                          | 385 |
| FWf2/243-679     | LNNANPSLIA-RDWAIQIQGADDYFASLYNS-----                            | 437 |
| Fp279/40-449     | PG-TGEQLLI-REWGMAQLELIDADLAERQEP-----                           | 410 |
| FWf1/15-439      | SG-TNEQLVG-TDWALAQLNGMDAHLMELEAPGAPNWSRQETVLSEAK                | 425 |
| Fp277/26-435     | SSNDNAKLVA-TDWALAQLTGMDAHLAQLQEP-----                           | 409 |
| SVI_0379/26-367  | SKLADHAITFMNDVTAKIIISNGGTRCTVTIDPS-----                         | 341 |
| Fda1/23-372      | ELGGGGARLI-SE-----P-----                                        | 350 |
| Fda2/84-439      | SVSGGEAMLI-SA-----P-----                                        | 356 |
| Mef2/22-383      | GRMPPEMVMKEVNRRLLL--NEDCEAYTRPAGARLEGE-----                     | 362 |
| P5A_FcnA/36-393  | GYMTADEMSIMIEISNRMTQTPKPDYSVYERP-----                           | 358 |
| P19D_FcnA/31-393 | GYMSADEMDIMIEINNRMTPQAPKLDYEAYERP-----                          | 363 |

**Figure S1.** Multiple alignment of the catalytic domain (D1) of the fucoidanases Mef2 with other GH107 family members. The conserved catalytic amino acid aspartate (red) and histidine (blue) are indicated. Conserved amino acids around the -1 subsite are indicated purple. Changes in conserved positions (orange and underlined) are indicated. Mef2 (GenBank: ON099398), Fhf1 (RefSeq: WP\_066217780), Fhf2 (RefSeq: WP\_066217784.1), Fhf3 (RefSeq: WP\_066217796.1), FFA1 (RefSeq: WP\_057784217.1), FFA2 (RefSeq: WP\_057784219.1), Fda1 (GenBank: AAO00508.1), Fda2 (GenBank: AAO00509.1), MfFcnA (GenBank: CAI47003.1), P5AFcnA (GenBank: AYF59291.1), P19DFcnA (GenBank: AYF59292.1), SVI\_0379 (GenBank: BAJ00350.1), FWF1 (GenBank: ANW96097.1), FWF2 (GenBank: ANW96098.1), FWF3 (GenBank: ANW96115.1), FWF4 (GenBank: ANW96116.1), Fp273 (GenBank: AYC81238.1), Fp277 (GenBank: AYC81239.1), Fp279 (GenBank: AYC81240.1).



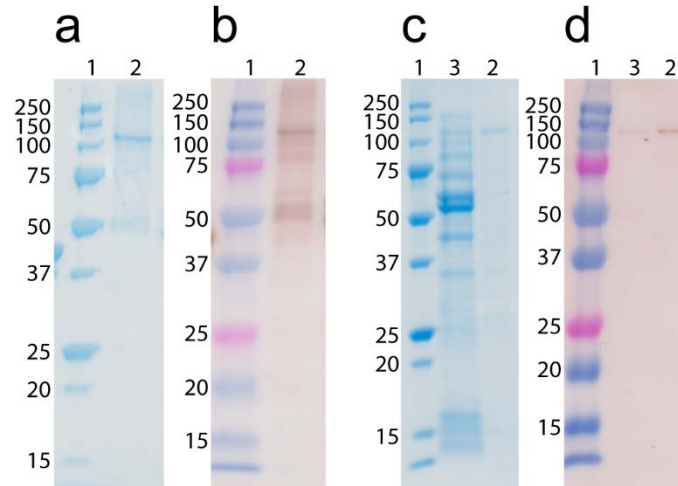

**Figure S2.** Recombinant expression and purification of the Mef2 fucoidanase. SDS-PAGE of a) purified Mef2 (2)(expression at 20 °C, O/N) and c) crude (3) and purified Mef2 (2)(expression at 37 °C, 4h). Western blot of b) purified Mef2 (2)(expression at 20 °C, O/N) and d) crude (3) and purified Mef2 (2)(expression at 37 °C, 4h). 1) Protein standards.

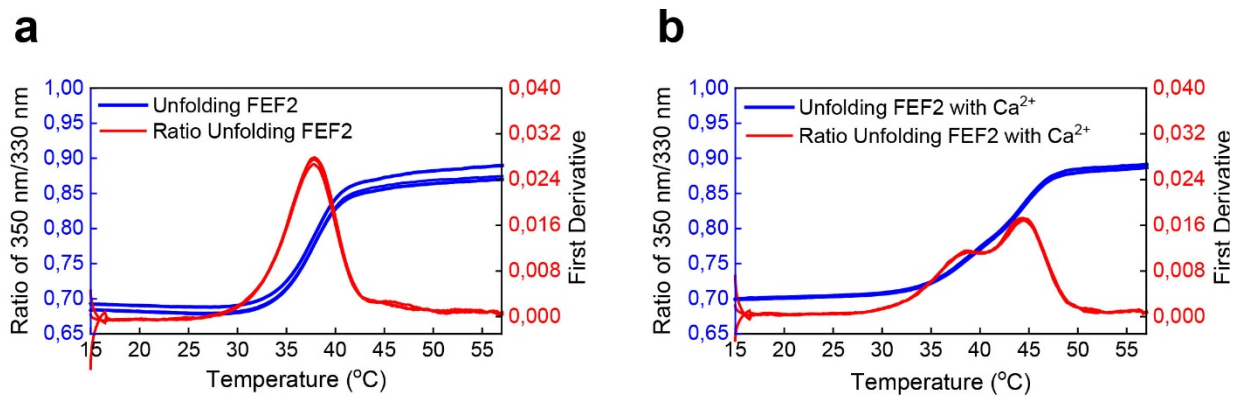

**Figure S3.** Thermostability assessments of Mef2 by DLS. a) Thermostability of Mef2 without  $\text{Ca}^{2+}$  and b) with  $\text{Ca}^{2+}$ .

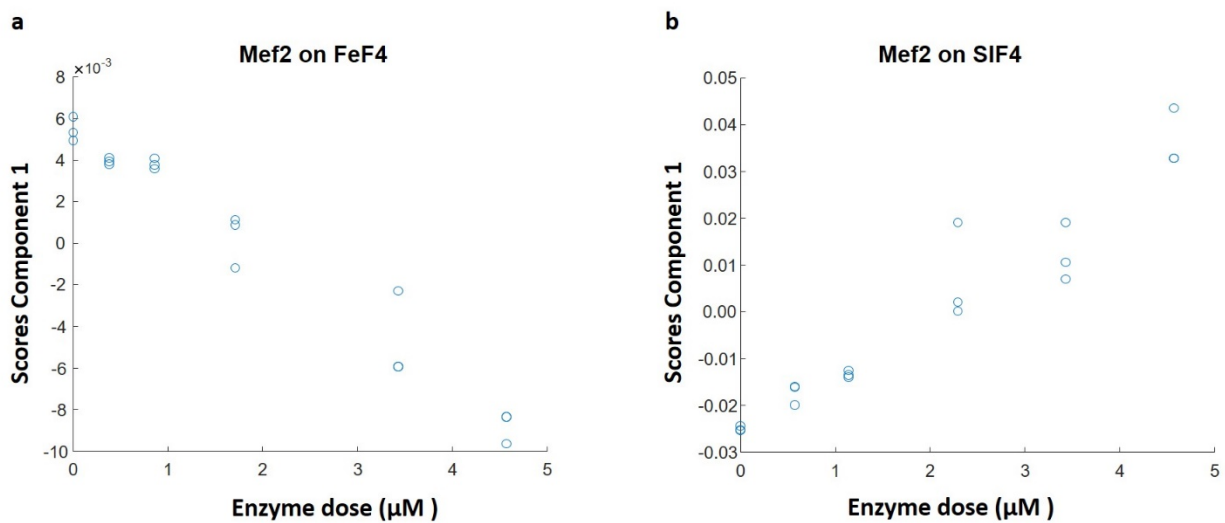

**Figure S4.** PARAFAC first component scores versus enzyme dosage were plotted to build calibrations. a) for Mef2 on *F. evanescens* FeF4 fucoidans with  $R^2=0.97$ , b) for Mef2 on *S. latissima* SIF4 fucoidans with  $R^2=0.98$ .

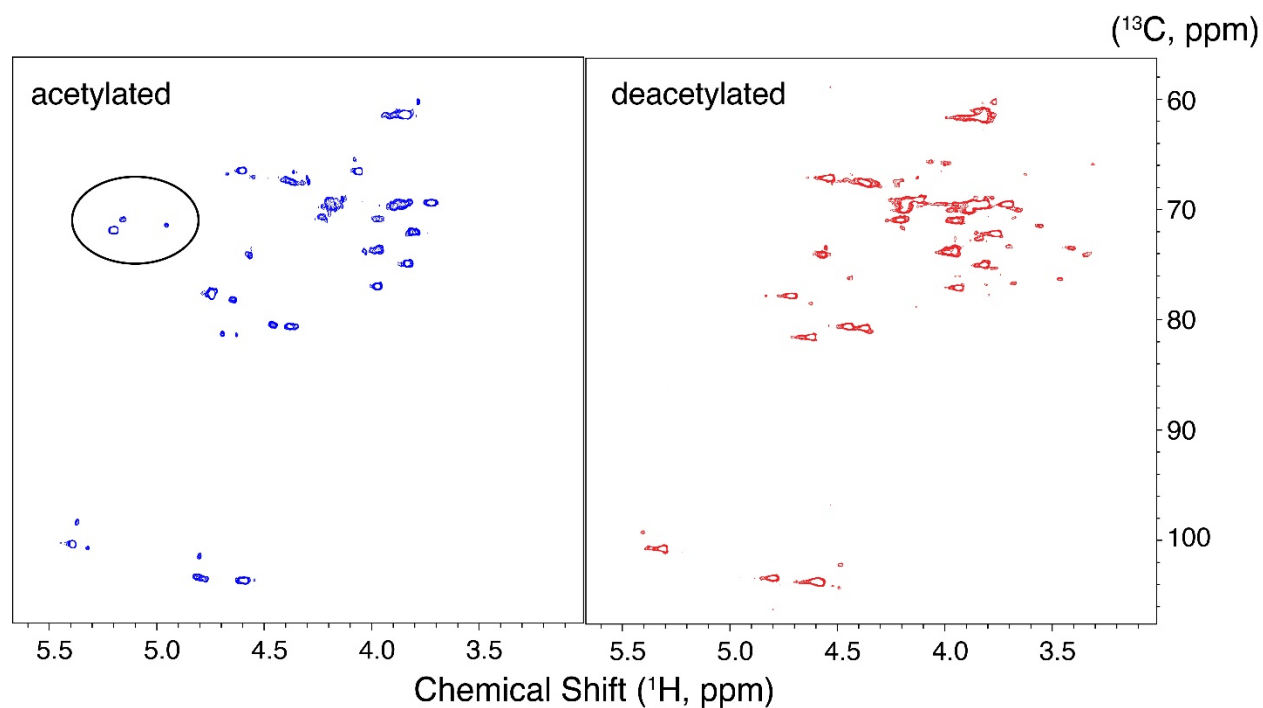

**Figure S5.** NMR analysis of deacetylation of *S. latissima* fucoidans. Circle indicates acetylations, which were gone after the deacetylation process.

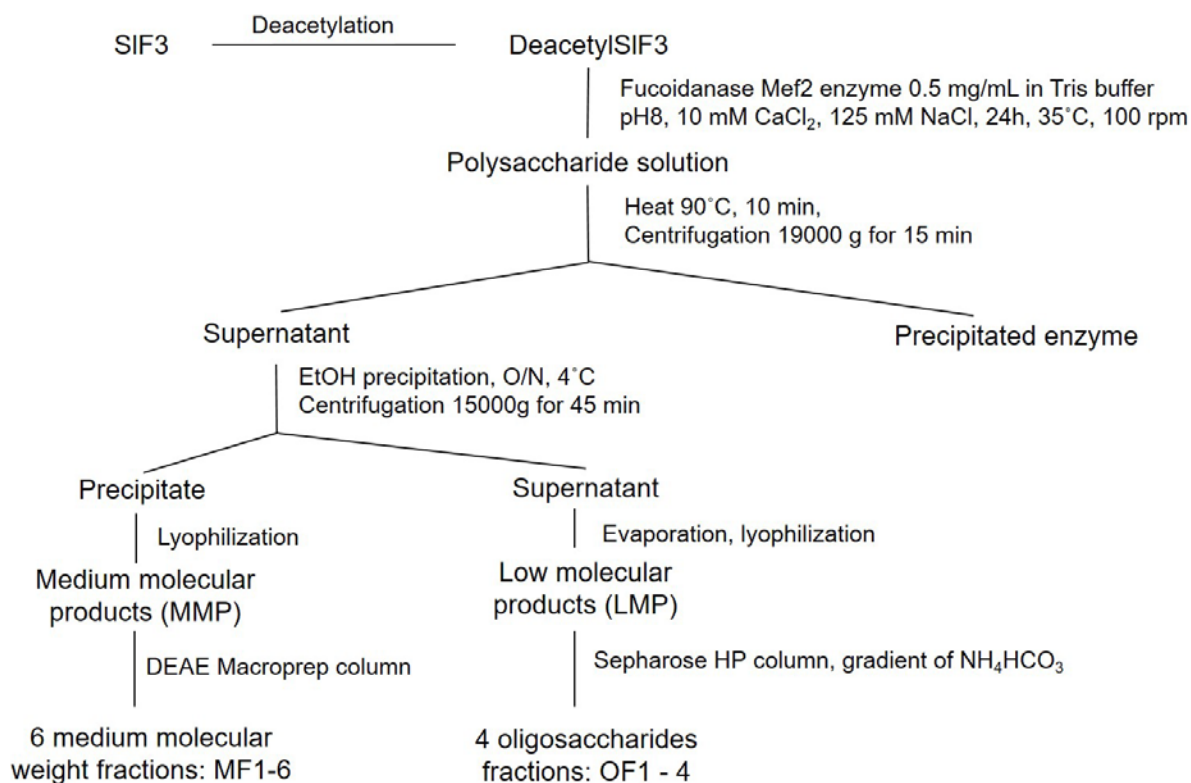

**Figure S6.** Flow-chart of enzymatic hydrolysis of fucoidans from *S. latissima* and further product separation

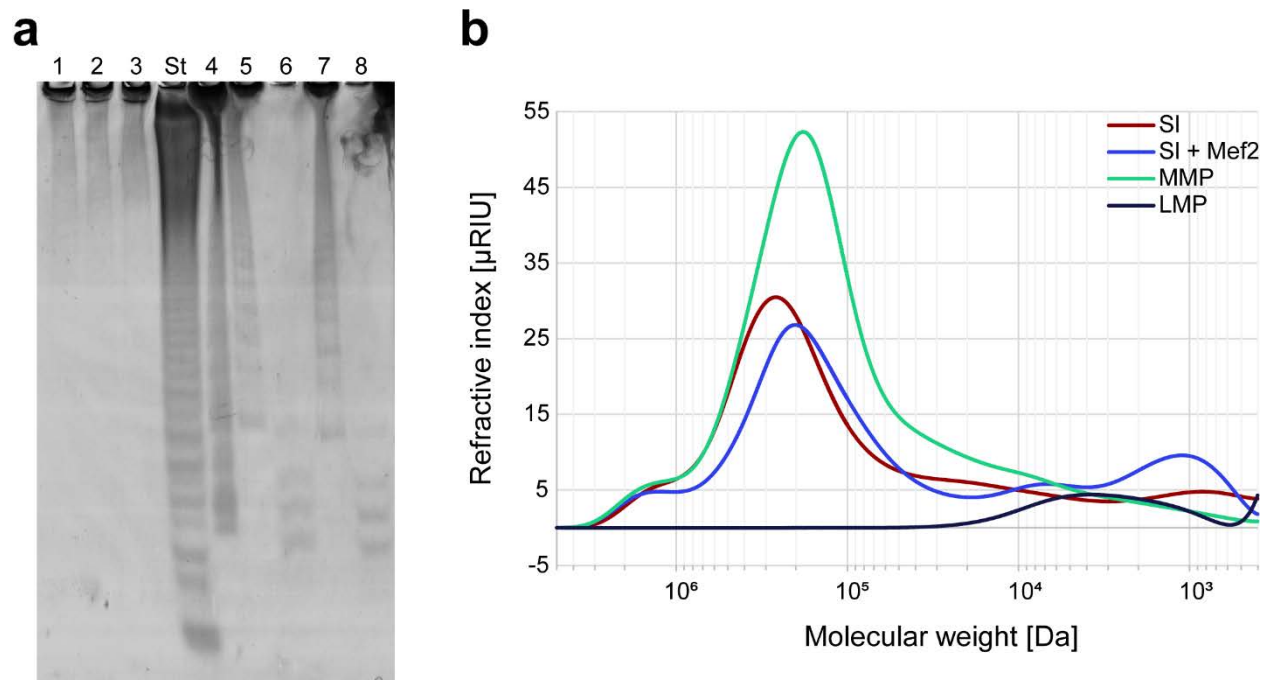

**Figure S7.** Medium and low molecular weight fucoidans after Mef2 hydrolysis of fucoidans from *S. latissima*. a) 1) DeSIF3; 2) DeSIF3 + heat 90 °C, 10 min; 3) DeSIF3 + heat 90 °C, 1 hour; 4) DeSIF3 + Mef2; 5) MMP from DeSIF3 + Mef2; 6) LMP from DeSIF3 + Mef2; 7) MMP (DeSIF3 + Mef2) + Mef2; 8) LMP (DeSIF3 + Mef2) + Mef2. The standard (St) is the product profile of FFA2 treatment of fucoidan from *F. evanescens*. b) HP-SEC chromatograms of MMP and LMP of Mef2 on fucoidan from *S. latissima*.

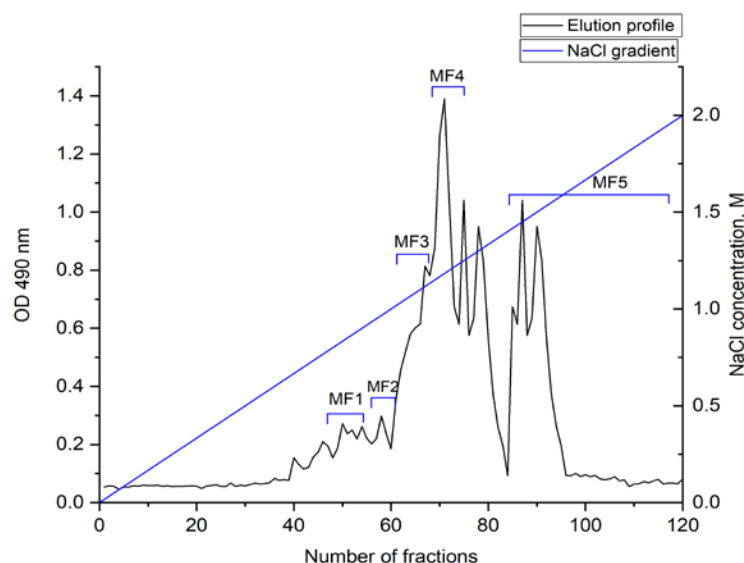

**Figure S8.** Separation of *S. latissima* MMP products on DEAE macrorep column. The total sugar content was detected by the phenol-sulfuric acid method.

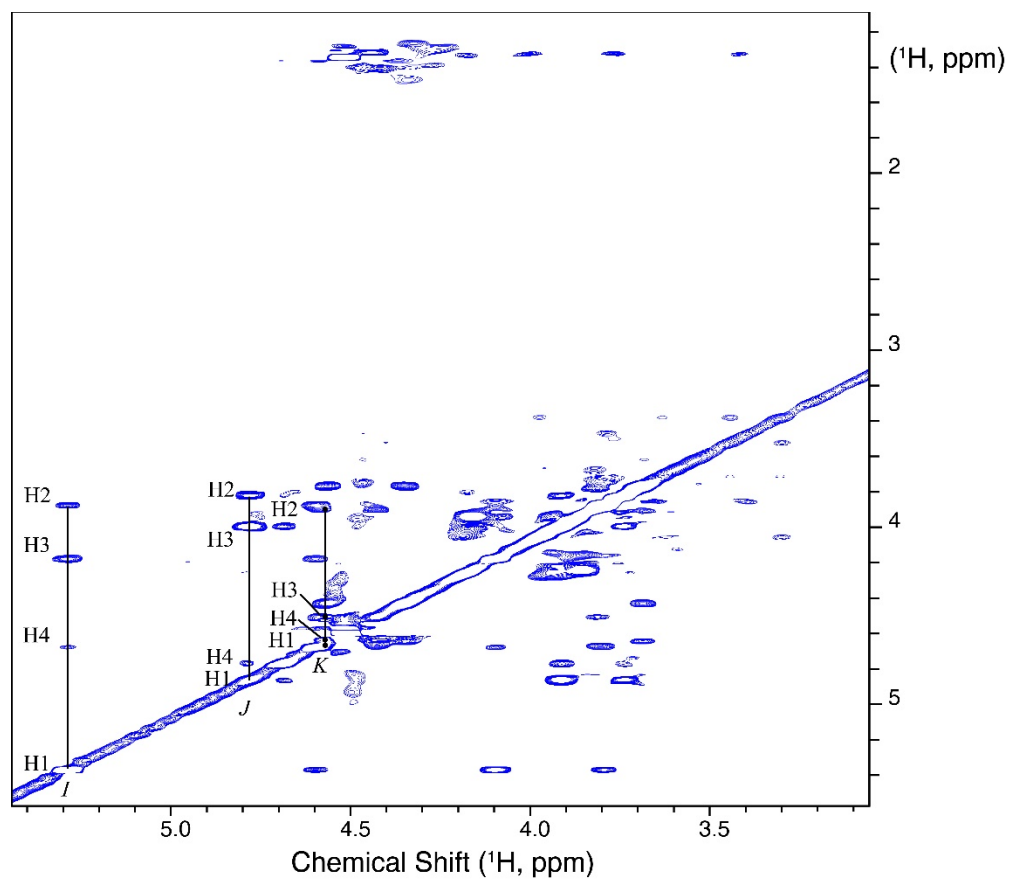

**Figure S9.**  $^1\text{H}$ - $^1\text{H}$  TOCSY NMR spectrum for the deacetylated *S. latissima* MMP. The spectrum shows the correlations between H1, H2, H3 and H4 for the three spin systems I, J and K in the MMP described in Figure 7d and in Table 3.

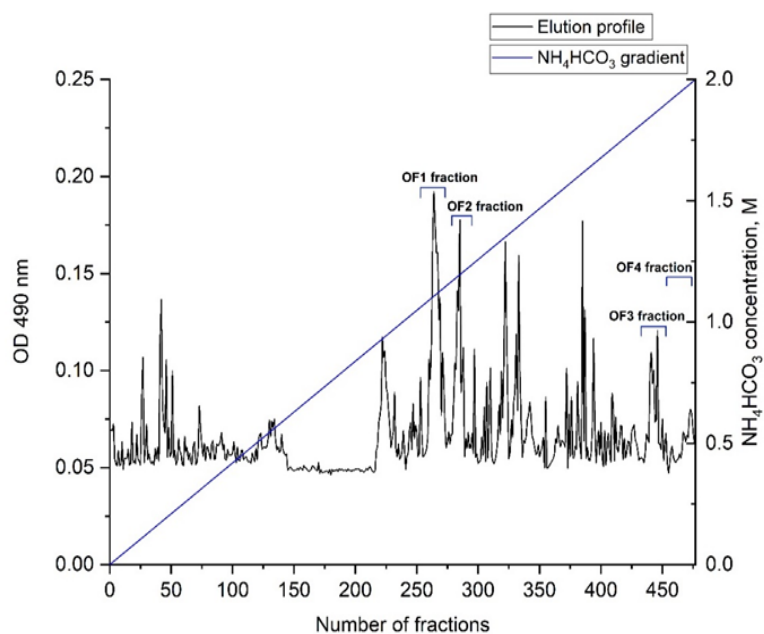

**Figure S10.** Separation of *S. latissima* LMP products on Q sepharose High Performance column. The total sugar content was detected by the phenol-sulfuric acid method.

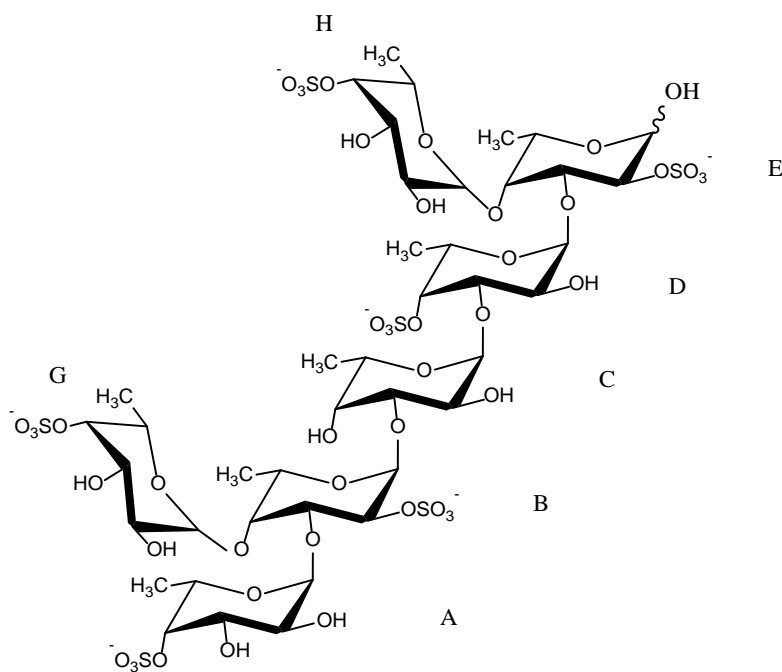

**Figure S11.** The proposed structure of the *S. latissima* OF2 fraction

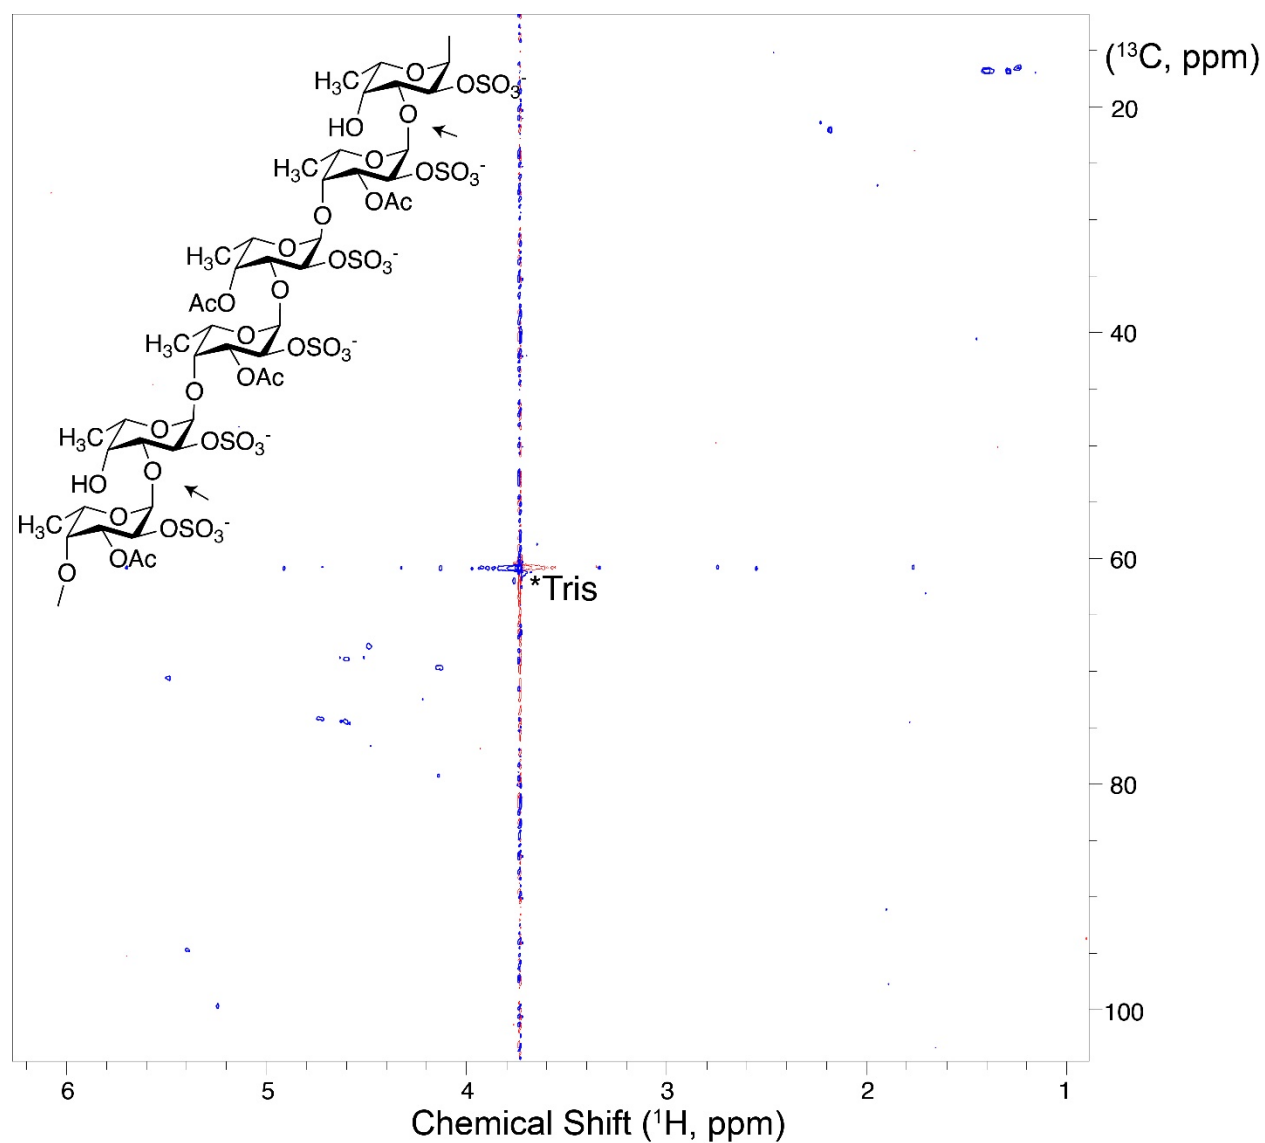

**Figure S12.**  $^1\text{H}$ - $^{13}\text{C}$  NMR spectra of LMP from *F. evanescens* fucoidan after Mef2 hydrolysis. Upon cleavage of *F. evanescens* fucoidans, the reducing end is not visible due to limitations with regards to material and due to length of the product. Arrows indicate possible Mef2 cleavage sites.

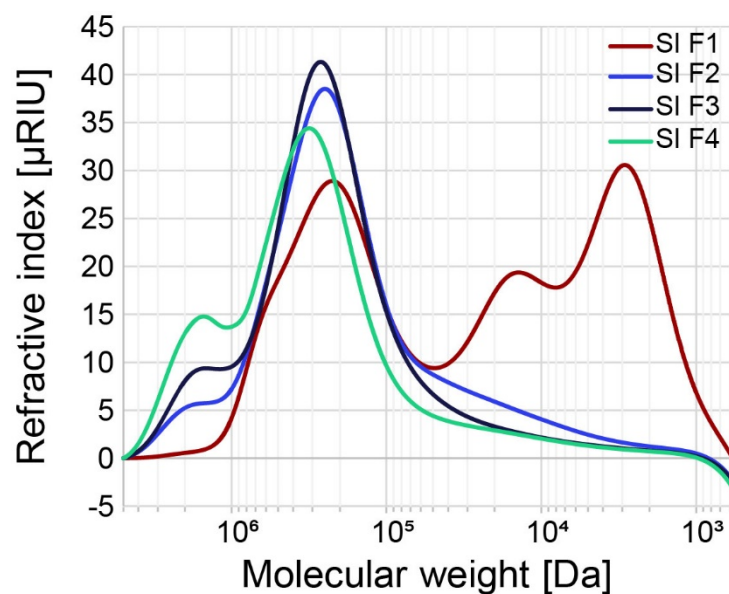

**Figure S13.** HP-SEC chromatogram of fucoidan fractions from *S. latissima* from Ocean Rainforest after IEX purification. The SIF1 fraction contains low molecular weight compounds (likely partially degraded alginates) of around 2 - 12 kDa and a proportion of HMP compounds between ~200–600 kDa. The SIF2 and SIF3 contain HMP fucoidan compounds ranging from ~250 kDa to over 800 kDa. The SIF4 contain more HMP compounds ranging from ~300 kDa to over 800 kDa. Pullulan was used as standard.
